# Supplementary material
Source: publisher site journal article supplement (https://www.spandidos-publications.com/6027/downloadSupplementary)
Supplement: Supplementary file 1 [file downloadSupplementary]

## Sheet: classical_down_A485_vs_con
Supplementary Table II: Downregulated genes in classical cell lines (PaTu-S, Capan-1, Capan-2, Colo357) after 24h A485 (1µM) treatment compared to control-treated cell lines
n=619	BaseMean	log2Fold Change	lFCSE	Stat	P-value	Padj	Symbol
ENSG00000166557	2248.39	-0.346089	0.105715	-3.27378	0.0010612	0.0629126	TMED3
ENSG00000188706	3088.26	-0.377313	0.115863	-3.25655	0.00112777	0.0659606	ZDHHC9
ENSG00000196531	11402.1	-0.382307	0.112165	-3.40843	0.000653385	0.0438342	NACA
ENSG00000185551	4069.95	-0.404566	0.0986601	-4.10061	4.12067e-05	0.00484667	NR2F2
ENSG00000167460	5245.07	-0.404853	0.128048	-3.16173	0.00156834	0.083532	TPM4
ENSG00000115963	685.524	-0.405948	0.124779	-3.25334	0.00114058	0.0664381	RND3
ENSG00000132623	681.314	-0.41514	0.129971	-3.19409	0.0014027	0.0769433	ANKEF1
ENSG00000166197	4548.12	-0.419874	0.127894	-3.28298	0.00102715	0.0614898	NOLC1
ENSG00000144645	1219.42	-0.430067	0.135333	-3.17785	0.0014837	0.0803059	OSBPL10
ENSG00000141429	783.329	-0.447745	0.144357	-3.10166	0.0019244	0.096475	GALNT1
ENSG00000166900	653.563	-0.454557	0.134947	-3.36842	0.000755996	0.0487571	STX3
ENSG00000156026	2155.71	-0.454676	0.140201	-3.24303	0.00118268	0.0677077	MCU
ENSG00000092820	11925.7	-0.456418	0.120699	-3.78145	0.000155915	0.0138538	EZR
ENSG00000172216	1195.03	-0.457684	0.140419	-3.25941	0.00111645	0.0657307	CEBPB
ENSG00000196154	11643.1	-0.461465	0.133478	-3.45723	0.000545751	0.0378591	S100A4
ENSG00000112378	6629.03	-0.464675	0.143727	-3.23304	0.00122479	0.0695763	PERP
ENSG00000099219	1154.52	-0.46757	0.150328	-3.11032	0.00186882	0.0947238	ERMP1
ENSG00000119471	2313.12	-0.468239	0.132566	-3.53212	0.000412247	0.0302932	HSDL2
ENSG00000176463	1279.57	-0.468499	0.126456	-3.70483	0.000211529	0.0178448	SLCO3A1
ENSG00000152894	2017.04	-0.470383	0.140184	-3.35548	0.000792266	0.0503006	PTPRK
ENSG00000163399	4574.58	-0.47116	0.133756	-3.52252	0.000427457	0.0311857	ATP1A1
ENSG00000151491	2949.2	-0.47312	0.125422	-3.77223	0.000161795	0.0143416	EPS8
ENSG00000117335	8216.55	-0.473451	0.095883	-4.93779	7.90113e-07	0.000192952	CD46
ENSG00000160752	1650.29	-0.476783	0.123992	-3.84528	0.000120415	0.011187	FDPS
ENSG00000143815	5793.77	-0.479892	0.116979	-4.10238	4.08919e-05	0.00482511	LBR
ENSG00000117984	7338.71	-0.480289	0.147705	-3.25169	0.00114721	0.0665059	CTSD
ENSG00000160191	600.514	-0.481942	0.139141	-3.46369	0.000532819	0.0371727	PDE9A
ENSG00000070961	1391.75	-0.484251	0.146878	-3.29697	0.000977343	0.0593801	ATP2B1
ENSG00000171604	655.288	-0.4884	0.155609	-3.13863	0.00169738	0.0876073	CXXC5
ENSG00000172893	7075.33	-0.491959	0.121586	-4.04618	5.20597e-05	0.00578327	DHCR7
ENSG00000162600	291.411	-0.497115	0.157814	-3.15	0.00163268	0.0850317	OMA1
ENSG00000136237	411.894	-0.497501	0.153912	-3.23237	0.00122769	0.0696328	RAPGEF5
ENSG00000161011	3043.52	-0.498366	0.139636	-3.56904	0.000358288	0.0275065	SQSTM1
ENSG00000164251	2909.22	-0.499412	0.15512	-3.21951	0.00128409	0.0720525	F2RL1
ENSG00000167306	872.141	-0.500928	0.155354	-3.22442	0.00126226	0.0711541	MYO5B
ENSG00000163513	4586.46	-0.503968	0.159981	-3.15017	0.00163177	0.0850317	TGFBR2
ENSG00000170385	1459.19	-0.508749	0.139258	-3.65328	0.000258914	0.0208821	SLC30A1
ENSG00000133639	753.354	-0.51081	0.153063	-3.33726	0.000846084	0.0527143	BTG1
ENSG00000153113	6181.64	-0.512332	0.150956	-3.39393	0.000688977	0.0460535	CAST
ENSG00000163624	1560.3	-0.513277	0.143556	-3.57545	0.000349631	0.0270114	CDS1
ENSG00000163932	754.402	-0.517778	0.132648	-3.9034	9.48524e-05	0.00923459	PRKCD
ENSG00000113161	3062.41	-0.518027	0.139705	-3.70799	0.000208908	0.0177597	HMGCR
ENSG00000196924	3244.88	-0.518413	0.161438	-3.21121	0.00132175	0.0736031	FLNA
ENSG00000050405	4536.9	-0.519232	0.144201	-3.60076	0.000317291	0.0248796	LIMA1
ENSG00000139428	841.554	-0.521582	0.164631	-3.16819	0.00153391	0.0822069	MMAB
ENSG00000197077	1322.45	-0.522531	0.167147	-3.12617	0.001771	0.090642	KIAA1671
ENSG00000143870	3088.94	-0.527387	0.168113	-3.13709	0.00170635	0.087823	PDIA6
ENSG00000137842	979.227	-0.530603	0.119796	-4.42921	9.45768e-06	0.00147744	TMEM62
ENSG00000065361	1842.67	-0.537749	0.153482	-3.50365	0.000458932	0.0331524	ERBB3
ENSG00000157600	832.74	-0.537754	0.147545	-3.64468	0.000267723	0.0214981	TMEM164
ENSG00000107863	1525.92	-0.538806	0.156824	-3.43574	0.000590934	0.04032	ARHGAP21
ENSG00000115339	1832.76	-0.539331	0.166278	-3.24355	0.00118051	0.0676895	GALNT3
ENSG00000165959	1034.79	-0.540068	0.154541	-3.49466	0.00047466	0.0341541	CLMN
ENSG00000135269	2939.55	-0.541105	0.11414	-4.74071	2.12968e-06	0.000429412	TES
ENSG00000164237	3526.69	-0.546619	0.121161	-4.51153	6.43626e-06	0.00106905	CMBL
ENSG00000111816	1012.69	-0.547206	0.176496	-3.10038	0.00193273	0.0967602	FRK
ENSG00000159200	577.255	-0.547382	0.145359	-3.76571	0.000166075	0.0146502	RCAN1
ENSG00000128641	779.736	-0.548078	0.163306	-3.35613	0.000790408	0.0502697	MYO1B
ENSG00000109084	5558.09	-0.550054	0.13596	-4.04571	5.2164e-05	0.00578327	TMEM97
ENSG00000119986	740.936	-0.55006	0.132677	-4.14587	3.38525e-05	0.00411973	AVPI1
ENSG00000196083	911.978	-0.550071	0.16334	-3.36764	0.000758142	0.0488097	IL1RAP
ENSG00000158710	9351.67	-0.552427	0.149095	-3.7052	0.000211224	0.0178448	TAGLN2
ENSG00000121691	2104.14	-0.554267	0.147996	-3.74515	0.000180288	0.015715	CAT
ENSG00000165650	2315.39	-0.554407	0.156178	-3.54984	0.000385461	0.0289902	PDZD8
ENSG00000052795	421.488	-0.555438	0.172847	-3.21346	0.00131145	0.0732198	FNIP2
ENSG00000148841	528.642	-0.559921	0.181249	-3.08923	0.00200674	0.0992471	ITPRIP
ENSG00000139832	607.095	-0.561314	0.154057	-3.64356	0.000268897	0.0215452	RAB20
ENSG00000147592	1982.8	-0.562724	0.170542	-3.29962	0.000968171	0.0589203	LACTB2
ENSG00000104369	385.244	-0.562809	0.149369	-3.76792	0.000164614	0.0145563	JPH1
ENSG00000275410	834.875	-0.563429	0.180625	-3.11932	0.00181266	0.092388	HNF1B
ENSG00000039068	10998.8	-0.566563	0.115163	-4.91967	8.66888e-07	0.00020524	CDH1
ENSG00000073060	1812.14	-0.571977	0.140771	-4.06316	4.84132e-05	0.0054834	SCARB1
ENSG00000121057	1224.02	-0.575022	0.182348	-3.15343	0.00161363	0.0848357	AKAP1
ENSG00000104687	2564.51	-0.577708	0.124384	-4.64456	3.40796e-06	0.000638072	GSR
ENSG00000186350	893.679	-0.578985	0.177528	-3.26138	0.00110871	0.0654118	RXRA
ENSG00000102897	1629.81	-0.581808	0.132524	-4.39022	1.13239e-05	0.00170308	LYRM1
ENSG00000169756	1234.44	-0.582998	0.18772	-3.10568	0.00189842	0.0954449	LIMS1
ENSG00000101871	565.794	-0.583226	0.188765	-3.0897	0.00200361	0.0992259	MID1
ENSG00000130164	2536.9	-0.583561	0.157736	-3.69961	0.000215929	0.0181742	LDLR
ENSG00000125170	741.352	-0.588739	0.178192	-3.30395	0.000953331	0.0582103	DOK4
ENSG00000141447	1535.88	-0.589109	0.12734	-4.62625	3.72342e-06	0.000693596	OSBPL1A
ENSG00000109787	3034.11	-0.590009	0.138517	-4.25948	2.049e-05	0.00268544	KLF3
ENSG00000006555	395.034	-0.591198	0.181437	-3.25843	0.00112032	0.0657798	TTC22
ENSG00000171617	1875.16	-0.594276	0.134699	-4.41188	1.02478e-05	0.0015801	ENC1
ENSG00000179604	2198.71	-0.594952	0.153099	-3.88608	0.000101877	0.00981259	CDC42EP4
ENSG00000101846	1882.68	-0.59707	0.152948	-3.90374	9.47187e-05	0.00923459	STS
ENSG00000079459	6807.02	-0.598288	0.135037	-4.43055	9.39937e-06	0.00147744	FDFT1
ENSG00000159388	261.358	-0.599511	0.164211	-3.65085	0.000261371	0.021034	BTG2
ENSG00000135052	2808.11	-0.599959	0.113738	-5.27492	1.32813e-07	4.27529e-05	GOLM1
ENSG00000198873	346.37	-0.600644	0.173455	-3.46283	0.000534523	0.0372209	GRK5
ENSG00000171345	12671.3	-0.602788	0.181771	-3.3162	0.000912512	0.0559039	KRT19
ENSG00000198648	1774.23	-0.603031	0.155332	-3.8822	0.000103516	0.00989255	STK39
ENSG00000184349	522.269	-0.604336	0.186663	-3.23757	0.00120551	0.068769	EFNA5
ENSG00000145555	1257.6	-0.605091	0.164015	-3.68924	0.000224925	0.018802	MYO10
ENSG00000107262	815.511	-0.606304	0.164579	-3.68396	0.00022964	0.0190718	BAG1
ENSG00000123983	3139.47	-0.606418	0.112393	-5.39552	6.83257e-08	2.66739e-05	ACSL3
ENSG00000163931	16226.8	-0.608956	0.0928249	-6.56027	5.37105e-11	4.80736e-08	TKT
ENSG00000082438	1058.51	-0.609483	0.155852	-3.91065	9.20476e-05	0.0090803	COBLL1
ENSG00000102854	1687.78	-0.610024	0.176116	-3.46376	0.000532679	0.0371727	MSLN
ENSG00000112759	2564.87	-0.611193	0.117697	-5.19291	2.07027e-07	6.33107e-05	SLC29A1
ENSG00000170485	1131.26	-0.615949	0.154215	-3.9941	6.49418e-05	0.00673212	NPAS2
ENSG00000104267	480.136	-0.618577	0.149216	-4.14553	3.39035e-05	0.00411973	CA2
ENSG00000163082	2468.87	-0.618833	0.145601	-4.25021	2.13571e-05	0.00278911	SGPP2
ENSG00000164171	4724.78	-0.621079	0.183362	-3.38717	0.000706183	0.0467776	ITGA2
ENSG00000075142	5048.44	-0.621991	0.194029	-3.20565	0.00134756	0.0747002	SRI
ENSG00000140391	4974.11	-0.623236	0.190691	-3.2683	0.00108196	0.0639364	TSPAN3
ENSG00000141232	5010.96	-0.625452	0.161788	-3.86587	0.000110695	0.0103989	TOB1
ENSG00000163251	760.303	-0.62623	0.143214	-4.37269	1.22726e-05	0.001816	FZD5
ENSG00000127824	3688.57	-0.627953	0.188085	-3.33867	0.000841804	0.0525369	TUBA4A
ENSG00000129514	1470.17	-0.631059	0.182847	-3.4513	0.000557884	0.0386144	FOXA1
ENSG00000185015	849.598	-0.631232	0.176597	-3.57443	0.000350998	0.02706	CA13
ENSG00000112379	567.568	-0.631743	0.186201	-3.3928	0.000691811	0.0460751	ARFGEF3
ENSG00000141401	904.817	-0.631835	0.181058	-3.48968	0.000483601	0.034594	IMPA2
ENSG00000156535	1309.74	-0.632328	0.202392	-3.12427	0.00178245	0.091101	CD109
ENSG00000148296	241.233	-0.636879	0.188186	-3.3843	0.000713592	0.0468872	SURF6
ENSG00000108175	1894.63	-0.637786	0.162902	-3.91516	9.03458e-05	0.00893645	ZMIZ1
ENSG00000120885	3061.67	-0.638368	0.206352	-3.09358	0.00197754	0.098498	CLU
ENSG00000197321	717.677	-0.639893	0.178027	-3.59436	0.000325191	0.0252829	SVIL
ENSG00000167508	465.328	-0.64151	0.159508	-4.0218	5.77558e-05	0.00621544	MVD
ENSG00000179913	1627.12	-0.642739	0.148779	-4.32011	1.55953e-05	0.00220966	B3GNT3
ENSG00000164300	2892.38	-0.645574	0.182619	-3.53509	0.000407636	0.030117	SERINC5
ENSG00000107438	5400.17	-0.646147	0.133117	-4.85399	1.20999e-06	0.00026911	PDLIM1
ENSG00000085276	2703.28	-0.648479	0.128231	-5.05713	4.25624e-07	0.000112368	MECOM
ENSG00000124831	1864.35	-0.653359	0.184793	-3.53563	0.000406807	0.030117	LRRFIP1
ENSG00000116667	212.088	-0.655352	0.182266	-3.59559	0.000323663	0.025219	C1orf21
ENSG00000196498	2347.32	-0.660136	0.20787	-3.17572	0.00149464	0.0805929	NCOR2
ENSG00000178826	471.942	-0.660621	0.17982	-3.6738	0.00023897	0.0196331	TMEM139
ENSG00000226887	230.748	-0.660731	0.195101	-3.3866	0.000707634	0.0467893	ERVMER34-1
ENSG00000127334	490.098	-0.661479	0.171364	-3.86007	0.000113352	0.0106115	DYRK2
ENSG00000013588	23457.3	-0.662805	0.178398	-3.71532	0.000202951	0.0173966	GPRC5A
ENSG00000187231	639.859	-0.663582	0.148719	-4.462	8.11981e-06	0.0013069	SESTD1
ENSG00000143013	1017.9	-0.663651	0.162155	-4.09269	4.26399e-05	0.00492082	LMO4
ENSG00000105289	446.936	-0.663857	0.187158	-3.54704	0.000389586	0.0291768	TJP3
ENSG00000173598	459.106	-0.664409	0.193395	-3.43549	0.00059148	0.04032	NUDT4
ENSG00000000971	753.117	-0.668567	0.197564	-3.38406	0.000714226	0.0468872	CFH
ENSG00000072310	1323.87	-0.668967	0.17644	-3.79146	0.000149764	0.0134703	SREBF1
ENSG00000138162	2351.71	-0.669474	0.185182	-3.61523	0.000300081	0.0237842	TACC2
ENSG00000112699	987.487	-0.670118	0.156554	-4.28044	1.86526e-05	0.00255439	GMDS
ENSG00000122870	349.914	-0.671889	0.173004	-3.88366	0.000102896	0.00985891	BICC1
ENSG00000126368	410.546	-0.673718	0.193568	-3.48053	0.000500428	0.0354989	NR1D1
ENSG00000169129	876.145	-0.673905	0.207095	-3.25409	0.00113758	0.0663686	AFAP1L2
ENSG00000163110	6973.55	-0.673959	0.184373	-3.65541	0.000256768	0.0208143	PDLIM5
ENSG00000157193	840.065	-0.677756	0.143265	-4.73079	2.23647e-06	0.000448479	LRP8
ENSG00000165644	223.246	-0.677832	0.218479	-3.1025	0.00191894	0.0963328	COMTD1
ENSG00000149573	2981.97	-0.678101	0.165654	-4.09347	4.24962e-05	0.00492082	MPZL2
ENSG00000006534	1088	-0.678251	0.208765	-3.24887	0.00115863	0.0669577	ALDH3B1
ENSG00000161714	1922.13	-0.680065	0.207144	-3.28305	0.00102692	0.0614898	PLCD3
ENSG00000160789	1881.48	-0.681902	0.153032	-4.45593	8.35289e-06	0.00133854	LMNA
ENSG00000136379	3372.67	-0.683428	0.15058	-4.53865	5.66161e-06	0.000970861	ABHD17C
ENSG00000105357	499.25	-0.684766	0.165338	-4.14161	3.4487e-05	0.0041768	MYH14
ENSG00000165474	1512.99	-0.686001	0.154527	-4.43936	9.02263e-06	0.00143335	GJB2
ENSG00000132170	3937.82	-0.686181	0.152391	-4.50278	6.70707e-06	0.00110372	PPARG
ENSG00000050344	1688.01	-0.689336	0.212017	-3.25132	0.00114869	0.0665059	NFE2L3
ENSG00000099204	6007.49	-0.689666	0.141547	-4.87236	1.10274e-06	0.000248265	ABLIM1
ENSG00000197442	279.421	-0.690634	0.170658	-4.04689	5.19034e-05	0.00578327	MAP3K5
ENSG00000175662	567.91	-0.690685	0.200764	-3.44028	0.000581105	0.0398595	TOM1L2
ENSG00000099194	29024.2	-0.692812	0.189569	-3.65468	0.000257506	0.0208143	SCD
ENSG00000154229	808.17	-0.693057	0.208235	-3.32824	0.000873956	0.0539925	PRKCA
ENSG00000125798	395.27	-0.694508	0.215264	-3.2263	0.00125401	0.0707973	FOXA2
ENSG00000099282	1030.28	-0.695006	0.203723	-3.41152	0.000646025	0.0434994	TSPAN15
ENSG00000114315	1920.33	-0.697225	0.189379	-3.68164	0.000231734	0.0191963	HES1
ENSG00000109452	2005.84	-0.69735	0.209189	-3.33359	0.000857343	0.0532483	INPP4B
ENSG00000168502	204.699	-0.699009	0.206689	-3.38193	0.000719785	0.0471678	MTCL1
ENSG00000162496	1740.68	-0.704815	0.147174	-4.78898	1.67629e-06	0.000353534	DHRS3
ENSG00000120162	420.936	-0.706264	0.190511	-3.70721	0.000209553	0.0177597	MOB3B
ENSG00000109861	6780.05	-0.706426	0.13944	-5.06616	4.05912e-07	0.000109528	CTSC
ENSG00000125398	2035.9	-0.709383	0.22515	-3.15072	0.0016287	0.0850317	SOX9
ENSG00000167106	999.228	-0.711691	0.194689	-3.65552	0.000256658	0.0208143	FAM102A
ENSG00000109062	3803.82	-0.711758	0.204363	-3.48281	0.000496186	0.0353564	SLC9A3R1
ENSG00000116016	2869.9	-0.716743	0.203256	-3.52631	0.000421389	0.0308042	EPAS1
ENSG00000136261	2026.97	-0.722537	0.188863	-3.82572	0.000130392	0.0120476	BZW2
ENSG00000102934	801.515	-0.72307	0.197812	-3.65534	0.000256837	0.0208143	PLLP
ENSG00000166979	569.558	-0.726296	0.214609	-3.38427	0.000713665	0.0468872	EVA1C
ENSG00000169435	404.954	-0.726781	0.171567	-4.23613	2.27405e-05	0.00295925	RASSF6
ENSG00000107798	6048.43	-0.729966	0.209177	-3.48971	0.000483543	0.034594	LIPA
ENSG00000163898	2623.62	-0.73018	0.200855	-3.63536	0.000277594	0.0220973	LIPH
ENSG00000140022	340.446	-0.731406	0.222672	-3.28469	0.00102096	0.0613193	STON2
ENSG00000155760	447.536	-0.734303	0.210386	-3.49027	0.000482537	0.034594	FZD7
ENSG00000067064	2973.9	-0.734619	0.170324	-4.31307	1.61003e-05	0.00225509	IDI1
ENSG00000095203	1138.25	-0.735182	0.174408	-4.21531	2.49437e-05	0.00320055	EPB41L4B
ENSG00000150347	702.878	-0.735635	0.228588	-3.21817	0.00129013	0.0721708	ARID5B
ENSG00000072274	13282.5	-0.737424	0.175115	-4.21108	2.54154e-05	0.00324972	TFRC
ENSG00000196371	468.373	-0.738222	0.190342	-3.8784	0.000105145	0.00997029	FUT4
ENSG00000205213	1187.24	-0.742225	0.150598	-4.92851	8.28594e-07	0.000198457	LGR4
ENSG00000182795	2902.01	-0.742608	0.174129	-4.26471	2.0016e-05	0.00265924	C1orf116
ENSG00000198478	2164.39	-0.74645	0.146405	-5.09852	3.42311e-07	9.5456e-05	SH3BGRL2
ENSG00000176532	2847.64	-0.75041	0.161162	-4.65624	3.22036e-06	0.000612319	PRR15
ENSG00000109089	426.687	-0.750862	0.211544	-3.54944	0.000386057	0.0289902	CDR2L
ENSG00000154274	456.262	-0.75235	0.176273	-4.26809	1.9715e-05	0.00263084	C4orf19
ENSG00000154822	257.664	-0.752371	0.195464	-3.84916	0.000118525	0.0110394	PLCL2
ENSG00000112773	776.352	-0.75251	0.240617	-3.12742	0.00176351	0.0904618	TENT5A
ENSG00000136717	670.119	-0.754228	0.191176	-3.9452	7.97334e-05	0.00805755	BIN1
ENSG00000205336	4093.87	-0.760453	0.212034	-3.58646	0.000335193	0.0260054	ADGRG1
ENSG00000183779	2069.7	-0.761021	0.19293	-3.94455	7.99504e-05	0.00805755	ZNF703
ENSG00000176485	3282.57	-0.763387	0.231661	-3.29528	0.000983234	0.0595408	PLAAT3
ENSG00000151376	198.519	-0.764306	0.211558	-3.61275	0.000302966	0.0239611	ME3
ENSG00000159166	1002.15	-0.764496	0.17655	-4.33019	1.48978e-05	0.00212725	LAD1
ENSG00000119408	659.262	-0.767174	0.187886	-4.08318	4.44235e-05	0.00508628	NEK6
ENSG00000147689	619.832	-0.767684	0.242786	-3.16198	0.00156702	0.083532	FAM83A
ENSG00000110400	1136.15	-0.7706	0.184049	-4.18693	2.8275e-05	0.00354132	NECTIN1
ENSG00000109586	1222.73	-0.772479	0.142302	-5.42846	5.68413e-08	2.33833e-05	GALNT7
ENSG00000090013	2659.17	-0.773542	0.218828	-3.53493	0.000407885	0.030117	BLVRB
ENSG00000263528	125.492	-0.77386	0.245352	-3.15409	0.00161002	0.0847674	IKBKE
ENSG00000165312	593.747	-0.775299	0.214196	-3.61957	0.000295087	0.023439	OTUD1
ENSG00000165140	539.93	-0.776354	0.238417	-3.25629	0.00112879	0.0659606	FBP1
ENSG00000162390	128.111	-0.781304	0.245717	-3.17969	0.00147434	0.0799173	ACOT11
ENSG00000120318	259.561	-0.781554	0.244331	-3.19875	0.00138027	0.0760535	ARAP3
ENSG00000143878	781.145	-0.783597	0.164593	-4.7608	1.92824e-06	0.00039531	RHOB
ENSG00000166387	352.414	-0.785066	0.176295	-4.45313	8.46258e-06	0.00135022	PPFIBP2
ENSG00000157216	1113.02	-0.786983	0.172996	-4.54913	5.38683e-06	0.000932454	SSBP3
ENSG00000170786	267.008	-0.788125	0.255174	-3.08858	0.00201115	0.0993315	SDR16C5
ENSG00000163435	2758.79	-0.788229	0.239727	-3.28802	0.00100894	0.0607963	ELF3
ENSG00000108846	3740.41	-0.788456	0.18089	-4.35877	1.30798e-05	0.00189719	ABCC3
ENSG00000150540	353.213	-0.788468	0.246674	-3.19639	0.00139157	0.0765616	HNMT
ENSG00000148926	240.9	-0.791883	0.199027	-3.97878	6.92691e-05	0.00708069	ADM
ENSG00000160285	727.94	-0.794051	0.200205	-3.96618	7.3033e-05	0.00742408	LSS
ENSG00000176845	200.131	-0.795149	0.177688	-4.47497	7.64216e-06	0.0012409	METRNL
ENSG00000271605	555.127	-0.797602	0.224304	-3.5559	0.000376693	0.0285609	MILR1
ENSG00000169710	2893.48	-0.800963	0.162514	-4.92858	8.28301e-07	0.000198457	FASN
ENSG00000189120	349.685	-0.802283	0.195966	-4.09399	4.24017e-05	0.00492082	SP6
ENSG00000134324	453.996	-0.802431	0.20921	-3.83552	0.000125296	0.0116111	LPIN1
ENSG00000227036	594.247	-0.810216	0.188937	-4.28828	1.80063e-05	0.00248413	LINC00511
ENSG00000156011	358.716	-0.811357	0.237134	-3.42152	0.000622721	0.0421624	PSD3
ENSG00000101076	731.236	-0.812012	0.168924	-4.80697	1.53237e-06	0.00032885	HNF4A
ENSG00000065809	2280.59	-0.816771	0.171278	-4.7687	1.85421e-06	0.00038443	FAM107B
ENSG00000154310	834.349	-0.820158	0.225272	-3.64075	0.000271849	0.021687	TNIK
ENSG00000131069	1221.24	-0.820736	0.144208	-5.69134	1.26049e-08	6.0073e-06	ACSS2
ENSG00000164976	888.697	-0.827115	0.168609	-4.90552	9.31808e-07	0.0002178	MYORG
ENSG00000071575	802.299	-0.827177	0.207759	-3.98143	6.8503e-05	0.00704161	TRIB2
ENSG00000137834	279.944	-0.828079	0.226495	-3.65606	0.000256122	0.0208143	SMAD6
ENSG00000143153	5621.56	-0.829765	0.178509	-4.64831	3.34659e-06	0.00063304	ATP1B1
ENSG00000198774	109.989	-0.829996	0.238905	-3.47417	0.000512431	0.0360243	RASSF9
ENSG00000180817	5490.83	-0.839515	0.209492	-4.00738	6.13968e-05	0.00648423	PPA1
ENSG00000119125	4441.59	-0.842068	0.224034	-3.75867	0.000170821	0.0149676	GDA
ENSG00000156463	778.764	-0.844291	0.184576	-4.57421	4.7802e-06	0.000847435	SH3RF2
ENSG00000137393	158.144	-0.844334	0.247321	-3.41392	0.000640355	0.0431969	RNF144B
ENSG00000183742	1734.15	-0.845256	0.157976	-5.35055	8.76881e-08	3.28356e-05	MACC1
ENSG00000136997	5024.63	-0.845397	0.245016	-3.45038	0.000559796	0.0386144	MYC
ENSG00000131389	1126.9	-0.849281	0.122079	-6.95682	3.48042e-12	3.7565e-09	SLC6A6
ENSG00000125730	377.135	-0.851005	0.257108	-3.30991	0.000933247	0.0570789	C3
ENSG00000155368	10644.6	-0.851862	0.160856	-5.2958	1.18499e-07	4.06409e-05	DBI
ENSG00000196872	236.415	-0.853563	0.219778	-3.88375	0.000102856	0.00985891	CRACDL
ENSG00000115919	883.394	-0.853596	0.240402	-3.55071	0.000384198	0.0289902	KYNU
ENSG00000213949	265.489	-0.854547	0.212389	-4.0235	5.73384e-05	0.00621544	ITGA1
ENSG00000135363	86.7601	-0.854687	0.272445	-3.1371	0.00170626	0.087823	LMO2
ENSG00000139044	94.3937	-0.855662	0.253555	-3.37466	0.00073907	0.048088	B4GALNT3
ENSG00000154127	1524.65	-0.85571	0.18028	-4.74656	2.06909e-06	0.000419499	UBASH3B
ENSG00000183840	253.946	-0.858194	0.202774	-4.23227	2.31348e-05	0.00298935	GPR39
ENSG00000064651	1410.78	-0.858211	0.224719	-3.81904	0.000133975	0.0122892	SLC12A2
ENSG00000069535	409.742	-0.864119	0.278204	-3.10606	0.001896	0.0954449	MAOB
ENSG00000076864	387.93	-0.86446	0.271491	-3.18412	0.00145196	0.0790542	RAP1GAP
ENSG00000114805	533.564	-0.864512	0.214951	-4.02191	5.7728e-05	0.00621544	PLCH1
ENSG00000254166	1419.28	-0.864903	0.15593	-5.54674	2.91052e-08	1.25656e-05	CASC19
ENSG00000117115	1935.92	-0.865183	0.273201	-3.16684	0.00154105	0.082437	PADI2
ENSG00000124766	745.73	-0.866987	0.17092	-5.07248	3.92656e-07	0.000106735	SOX4
ENSG00000196167	163.098	-0.867118	0.280888	-3.08706	0.00202145	0.0995721	COLCA1
ENSG00000007944	217.199	-0.867335	0.160378	-5.40808	6.37047e-08	2.51373e-05	MYLIP
ENSG00000171766	1222.27	-0.869504	0.199116	-4.36682	1.26071e-05	0.00185057	GATM
ENSG00000138413	4692	-0.870417	0.146757	-5.931	3.01086e-09	1.81131e-06	IDH1
ENSG00000136111	662.765	-0.871162	0.159056	-5.47707	4.32426e-08	1.8452e-05	TBC1D4
ENSG00000166377	744.716	-0.873677	0.155324	-5.62486	1.8566e-08	8.30873e-06	ATP9B
ENSG00000115107	463.642	-0.875108	0.19452	-4.49881	6.83351e-06	0.00111951	STEAP3
ENSG00000135048	1133.57	-0.883126	0.214097	-4.12489	3.70913e-05	0.00441929	CEMIP2
ENSG00000008394	11620.5	-0.884096	0.202576	-4.36427	1.27551e-05	0.00186483	MGST1
ENSG00000078401	189.784	-0.884345	0.185742	-4.76114	1.92499e-06	0.00039531	EDN1
ENSG00000120549	1418.44	-0.885743	0.175971	-5.03347	4.81672e-07	0.000123608	KIAA1217
ENSG00000115414	947.24	-0.887921	0.281276	-3.15676	0.00159532	0.0844639	FN1
ENSG00000052802	6582.31	-0.889953	0.233066	-3.81846	0.000134288	0.0122892	MSMO1
ENSG00000156453	2938.48	-0.893728	0.228955	-3.90351	9.48068e-05	0.00923459	PCDH1
ENSG00000141934	1365.09	-0.893794	0.18564	-4.81466	1.47452e-06	0.000318298	PLPP2
ENSG00000081923	989.901	-0.896459	0.154959	-5.78515	7.24476e-09	3.74452e-06	ATP8B1
ENSG00000102996	1036.95	-0.898214	0.215402	-4.16994	3.04684e-05	0.00376465	MMP15
ENSG00000160796	885.352	-0.900653	0.279388	-3.22367	0.00126561	0.0712331	NBEAL2
ENSG00000166016	183.915	-0.902042	0.258817	-3.48526	0.000491667	0.0351025	ABTB2
ENSG00000184254	2339.9	-0.903119	0.230671	-3.91518	9.0338e-05	0.00893645	ALDH1A3
ENSG00000148175	1772.29	-0.903698	0.268999	-3.35949	0.000780871	0.0498015	STOM
ENSG00000174130	129.491	-0.905164	0.293286	-3.08628	0.00202677	0.0997	TLR6
ENSG00000196730	1698.1	-0.905473	0.21668	-4.17885	2.92983e-05	0.0036446	DAPK1
ENSG00000104549	4715.44	-0.905911	0.140539	-6.44598	1.14859e-10	9.57953e-08	SQLE
ENSG00000169752	303.332	-0.907775	0.27319	-3.32287	0.000890959	0.0549505	NRG4
ENSG00000145685	664.527	-0.908431	0.17106	-5.3106	1.09266e-07	3.78276e-05	LHFPL2
ENSG00000136542	1324.12	-0.90849	0.227389	-3.99531	6.46089e-05	0.00671658	GALNT5
ENSG00000087842	1527.04	-0.911671	0.156148	-5.83851	5.2669e-09	2.80115e-06	PIR
ENSG00000157514	407.191	-0.913098	0.24627	-3.70771	0.000209139	0.0177597	TSC22D3
ENSG00000134508	1226.99	-0.913284	0.223689	-4.08283	4.44913e-05	0.00508628	CABLES1
ENSG00000140961	265.955	-0.915778	0.220591	-4.15147	3.3035e-05	0.00404095	OSGIN1
ENSG00000118263	412.608	-0.928073	0.20427	-4.54336	5.53646e-06	0.000953857	KLF7
ENSG00000204385	546.411	-0.928766	0.190189	-4.88339	1.04278e-06	0.000236216	SLC44A4
ENSG00000116833	132.397	-0.930569	0.276085	-3.37059	0.000750069	0.04846	NR5A2
ENSG00000164626	258.999	-0.930766	0.206104	-4.51601	6.30158e-06	0.00105593	KCNK5
ENSG00000206075	3505	-0.930971	0.167381	-5.56198	2.66725e-08	1.16524e-05	SERPINB5
ENSG00000109255	407.853	-0.930994	0.174449	-5.33677	9.46144e-08	3.43769e-05	NMU
ENSG00000076356	358.239	-0.931899	0.230206	-4.04811	5.16318e-05	0.00578327	PLXNA2
ENSG00000104327	516.475	-0.935968	0.279561	-3.34799	0.000813992	0.0512523	CALB1
ENSG00000127329	326.847	-0.938038	0.297844	-3.14943	0.00163589	0.0850317	PTPRB
ENSG00000265763	320.032	-0.940091	0.213141	-4.41065	1.03062e-05	0.00158246	ZNF488
ENSG00000074181	1259.77	-0.940427	0.276524	-3.40088	0.000671687	0.0449798	NOTCH3
ENSG00000223572	76.437	-0.945466	0.298333	-3.16916	0.0015288	0.0821412	CKMT1A
ENSG00000154556	279.417	-0.9455	0.223905	-4.22278	2.41311e-05	0.00310716	SORBS2
ENSG00000148400	238.064	-0.946549	0.219237	-4.31746	1.57832e-05	0.00222768	NOTCH1
ENSG00000122547	162.631	-0.960137	0.238702	-4.02232	5.76272e-05	0.00621544	EEPD1
ENSG00000138193	490.292	-0.961402	0.186689	-5.14974	2.60845e-07	7.65778e-05	PLCE1
ENSG00000107249	498.23	-0.961985	0.29374	-3.27495	0.00105681	0.0628554	GLIS3
ENSG00000168785	221.433	-0.961997	0.20105	-4.78486	1.71103e-06	0.000358798	TSPAN5
ENSG00000148346	22391.1	-0.96913	0.181726	-5.33293	9.66431e-08	3.44321e-05	LCN2
ENSG00000101849	640.65	-0.969264	0.226795	-4.27376	1.92208e-05	0.00260275	TBL1X
ENSG00000196975	5899.58	-0.971786	0.191549	-5.0733	3.90984e-07	0.000106735	ANXA4
ENSG00000103811	5381.62	-0.97284	0.123032	-7.90718	2.63285e-15	6.03861e-12	CTSH
ENSG00000147642	158.366	-0.974002	0.315403	-3.08812	0.00201429	0.0993529	SYBU
ENSG00000239713	1097.78	-0.97618	0.30925	-3.15661	0.00159616	0.0844639	APOBEC3G
ENSG00000124429	707.117	-0.977083	0.199908	-4.88766	1.02043e-06	0.000232588	POF1B
ENSG00000108244	812.747	-0.977681	0.310516	-3.14857	0.00164073	0.0851626	KRT23
ENSG00000175874	680.691	-0.980832	0.299934	-3.27016	0.00107487	0.0636201	CREG2
ENSG00000124107	3598.35	-0.981851	0.163963	-5.98824	2.12126e-09	1.41534e-06	SLPI
ENSG00000155846	203.627	-0.98818	0.253958	-3.89112	9.97815e-05	0.00963601	PPARGC1B
ENSG00000164099	162.252	-0.9883	0.239843	-4.12061	3.77872e-05	0.00448763	PRSS12
ENSG00000076641	234.683	-0.993086	0.294449	-3.37269	0.000744378	0.0481772	PAG1
ENSG00000133135	315.361	-0.994741	0.182314	-5.4562	4.86424e-08	2.05176e-05	RNF128
ENSG00000085117	340.812	-0.994936	0.23288	-4.27231	1.93456e-05	0.00261003	CD82
ENSG00000144063	2412.16	-0.997109	0.227046	-4.39167	1.12485e-05	0.00170308	MALL
ENSG00000090382	1123.18	-0.997561	0.316665	-3.15021	0.00163153	0.0850317	LYZ
ENSG00000101384	1269.44	-0.998606	0.170185	-5.86777	4.41685e-09	2.45583e-06	JAG1
ENSG00000172197	917.695	-1.00342	0.198382	-5.05802	4.2363e-07	0.000112368	MBOAT1
ENSG00000135919	1343.04	-1.00455	0.273887	-3.66777	0.000244678	0.0200423	SERPINE2
ENSG00000107485	802.829	-1.00571	0.248055	-4.0544	5.02634e-05	0.00567543	GATA3
ENSG00000115290	96.1029	-1.00835	0.271443	-3.71479	0.000203372	0.0173966	GRB14
ENSG00000196139	8539.03	-1.0148	0.219853	-4.61582	3.91555e-06	0.000718444	AKR1C3
ENSG00000108352	266.101	-1.01598	0.265602	-3.8252	0.000130664	0.0120476	RAPGEFL1
ENSG00000177076	97.3327	-1.01634	0.287769	-3.5318	0.000412748	0.0302932	ACER2
ENSG00000186480	3597.37	-1.01952	0.130496	-7.81268	5.59828e-15	1.14133e-11	INSIG1
ENSG00000124225	5344.11	-1.02089	0.25616	-3.98536	6.73792e-05	0.00694554	PMEPA1
ENSG00000160867	415.362	-1.02108	0.232907	-4.38408	1.16476e-05	0.00173753	FGFR4
ENSG00000107242	323.722	-1.02357	0.234905	-4.35737	1.31633e-05	0.00190178	PIP5K1B
ENSG00000075651	439.11	-1.02563	0.191905	-5.34444	9.06951e-08	3.36186e-05	PLD1
ENSG00000077157	538.677	-1.02647	0.319458	-3.21315	0.00131288	0.0732198	PPP1R12B
ENSG00000134955	293.884	-1.02765	0.2883	-3.56451	0.00036453	0.0278112	SLC37A2
ENSG00000130066	2471.27	-1.02796	0.117291	-8.76425	1.88021e-18	7.66647e-15	SAT1
ENSG00000125657	395.487	-1.02842	0.194714	-5.28172	1.2798e-07	4.23106e-05	TNFSF9
ENSG00000172164	263.142	-1.03064	0.198154	-5.20119	1.98015e-07	6.10636e-05	SNTB1
ENSG00000111962	492.471	-1.0325	0.228319	-4.5222	6.12015e-06	0.00103392	UST
ENSG00000164379	1801.75	-1.03469	0.226362	-4.57095	4.85518e-06	0.000856589	FOXQ1
ENSG00000108448	370.275	-1.03572	0.19234	-5.38483	7.25141e-08	2.80111e-05	TRIM16L
ENSG00000204287	1298.04	-1.03741	0.29314	-3.53894	0.000401735	0.0299644	HLA-DRA
ENSG00000243566	1101.99	-1.04104	0.223572	-4.6564	3.2178e-06	0.000612319	UPK3B
ENSG00000146674	3060	-1.04187	0.237503	-4.38676	1.15052e-05	0.00172329	IGFBP3
ENSG00000182957	457.381	-1.04388	0.178331	-5.8536	4.81054e-09	2.59607e-06	SPATA13
ENSG00000115604	165.777	-1.05061	0.276234	-3.80334	0.000142756	0.0129671	IL18R1
ENSG00000146477	126.86	-1.05746	0.31572	-3.34937	0.000809957	0.0511583	SLC22A3
ENSG00000023171	456.951	-1.06286	0.316102	-3.3624	0.000772673	0.0495713	GRAMD1B
ENSG00000117472	3133.02	-1.06304	0.210308	-5.05471	4.31037e-07	0.000112984	TSPAN1
ENSG00000162981	250.762	-1.06409	0.320598	-3.31909	0.00090312	0.0555803	LRATD1
ENSG00000196517	230.988	-1.06844	0.284269	-3.75855	0.000170898	0.0149676	SLC6A9
ENSG00000167617	165.826	-1.07001	0.334183	-3.20188	0.00136536	0.0754587	CDC42EP5
ENSG00000140297	1037.79	-1.07112	0.190912	-5.61053	2.01705e-08	8.91802e-06	GCNT3
ENSG00000107738	1209.11	-1.07136	0.277026	-3.86736	0.000110019	0.0103789	VSIR
ENSG00000115648	876.51	-1.072	0.31066	-3.45072	0.000559089	0.0386144	MLPH
ENSG00000151726	995.156	-1.07265	0.150271	-7.1381	9.46284e-13	1.24021e-09	ACSL1
ENSG00000026508	7520.18	-1.07547	0.159264	-6.75272	1.45099e-11	1.47909e-08	CD44
ENSG00000246228	234.103	-1.07771	0.223833	-4.81479	1.47356e-06	0.000318298	CASC8
ENSG00000155066	665.052	-1.07771	0.257672	-4.18251	2.88309e-05	0.00359867	PROM2
ENSG00000163993	4142.76	-1.0786	0.218893	-4.92751	8.32832e-07	0.000198457	S100P
ENSG00000028137	293.737	-1.07915	0.202342	-5.33332	9.64325e-08	3.44321e-05	TNFRSF1B
ENSG00000106546	2050.17	-1.08036	0.205312	-5.26204	1.42463e-07	4.54604e-05	AHR
ENSG00000160188	53.1578	-1.08154	0.343612	-3.14755	0.00164646	0.0853394	RSPH1
ENSG00000214290	263.452	-1.08383	0.263834	-4.10801	3.99083e-05	0.00472424	COLCA2
ENSG00000153233	643.197	-1.08915	0.206086	-5.28493	1.25754e-07	4.19528e-05	PTPRR
ENSG00000073849	314.27	-1.09163	0.27465	-3.97463	7.04885e-05	0.00718533	ST6GAL1
ENSG00000149150	321.883	-1.09336	0.310666	-3.5194	0.000432532	0.0314309	SLC43A1
ENSG00000118777	425.792	-1.09464	0.256384	-4.26954	1.95878e-05	0.00262341	ABCG2
ENSG00000162545	2762.55	-1.10478	0.187156	-5.90302	3.56897e-09	2.06336e-06	CAMK2N1
ENSG00000253368	641.126	-1.10948	0.252715	-4.39025	1.1322e-05	0.00170308	TRNP1
ENSG00000060656	691.082	-1.11167	0.245867	-4.52144	6.14206e-06	0.00103392	PTPRU
ENSG00000182580	150.573	-1.12721	0.280031	-4.0253	5.69029e-05	0.00619634	EPHB3
ENSG00000124466	374.178	-1.13158	0.23147	-4.88866	1.01523e-06	0.000232588	LYPD3
ENSG00000111799	465.612	-1.13165	0.21918	-5.16311	2.42882e-07	7.30576e-05	COL12A1
ENSG00000137440	1394.05	-1.13385	0.325894	-3.4792	0.000502917	0.0355598	FGFBP1
ENSG00000111424	403.444	-1.13457	0.266252	-4.26127	2.03268e-05	0.00267359	VDR
ENSG00000142798	1175.1	-1.1367	0.300093	-3.78782	0.000151972	0.0136022	HSPG2
ENSG00000179104	290.04	-1.14226	0.243319	-4.69451	2.67251e-06	0.000527275	TMTC2
ENSG00000164176	304.037	-1.14366	0.310903	-3.67852	0.000234591	0.0193477	EDIL3
ENSG00000118596	1236.04	-1.144	0.259231	-4.41304	1.01928e-05	0.00157825	SLC16A7
ENSG00000104313	96.0991	-1.14901	0.364031	-3.15634	0.00159764	0.0844639	EYA1
ENSG00000114378	269.984	-1.15251	0.324717	-3.54927	0.000386305	0.0289902	HYAL1
ENSG00000185483	417.016	-1.15364	0.235625	-4.89608	9.77656e-07	0.00022707	ROR1
ENSG00000011347	226.458	-1.15671	0.244695	-4.72717	2.27668e-06	0.000454062	SYT7
ENSG00000152377	502.288	-1.15685	0.197429	-5.85959	4.64004e-09	2.54142e-06	SPOCK1
ENSG00000019102	210.126	-1.16365	0.299851	-3.88077	0.000104127	0.00992508	VSIG2
ENSG00000189221	225.284	-1.17496	0.308826	-3.8046	0.000142032	0.0129333	MAOA
ENSG00000124102	1029.43	-1.17884	0.252601	-4.66682	3.05904e-06	0.000593437	PI3
ENSG00000102886	76.8714	-1.19442	0.36468	-3.27525	0.00105569	0.0628554	GDPD3
ENSG00000138678	831.645	-1.20214	0.2124	-5.65978	1.51571e-08	6.94814e-06	GPAT3
ENSG00000114812	692.952	-1.20317	0.266747	-4.51051	6.46724e-06	0.00106905	VIPR1
ENSG00000049130	1223.94	-1.20363	0.221871	-5.42491	5.79851e-08	2.33833e-05	KITLG
ENSG00000116106	323.819	-1.20412	0.286158	-4.20788	2.57774e-05	0.00328456	EPHA4
ENSG00000104140	339.81	-1.20658	0.338737	-3.562	0.000368036	0.0280121	RHOV
ENSG00000128298	242.378	-1.20975	0.308721	-3.91859	8.90699e-05	0.00885799	BAIAP2L2
ENSG00000234678	209.012	-1.21426	0.266754	-4.55198	5.31443e-06	0.000924283	ELF3-AS1
ENSG00000172137	993.41	-1.21584	0.241381	-5.03701	4.72855e-07	0.0001222	CALB2
ENSG00000118515	2338.31	-1.21625	0.241247	-5.0415	4.61896e-07	0.000120214	SGK1
ENSG00000092969	676.447	-1.21765	0.246645	-4.93685	7.93953e-07	0.000192952	TGFB2
ENSG00000137673	1969.18	-1.21895	0.196521	-6.20265	5.55207e-10	4.42922e-07	MMP7
ENSG00000171522	114.275	-1.22322	0.349363	-3.50128	0.000463032	0.0333829	PTGER4
ENSG00000072422	109.369	-1.22533	0.35209	-3.48017	0.000501087	0.0354989	RHOBTB1
ENSG00000106258	366.44	-1.22948	0.212047	-5.79815	6.70515e-09	3.51513e-06	CYP3A5
ENSG00000099139	175.199	-1.22968	0.263978	-4.65828	3.18869e-06	0.000612319	PCSK5
ENSG00000175147	46.5701	-1.23189	0.375634	-3.27949	0.00103996	0.0620545	TMEM51-AS1
ENSG00000165376	2752.97	-1.23727	0.302312	-4.09268	4.26417e-05	0.00492082	CLDN2
ENSG00000167757	445.461	-1.23843	0.335659	-3.68954	0.000224663	0.018802	KLK11
ENSG00000049283	222.738	-1.25271	0.360335	-3.4765	0.000508006	0.0358505	EPN3
ENSG00000134198	334.824	-1.2538	0.286291	-4.37945	1.1898e-05	0.00176769	TSPAN2
ENSG00000174469	370.037	-1.26757	0.266907	-4.74913	2.04297e-06	0.000416505	CNTNAP2
ENSG00000127324	3660.75	-1.26828	0.192159	-6.60018	4.10664e-11	3.76753e-08	TSPAN8
ENSG00000235823	553.687	-1.27044	0.213042	-5.96335	2.47121e-09	1.53705e-06	OLMALINC
ENSG00000012171	217.996	-1.27311	0.308118	-4.1319	3.59782e-05	0.00431336	SEMA3B
ENSG00000088992	1855.94	-1.27485	0.265358	-4.80427	1.55318e-06	0.000331379	TESC
ENSG00000146411	232.319	-1.27776	0.321115	-3.97912	6.91706e-05	0.00708069	SLC2A12
ENSG00000173376	277.591	-1.28035	0.395306	-3.23888	0.0012	0.0685924	NDNF
ENSG00000196562	772.591	-1.28042	0.267948	-4.77859	1.76525e-06	0.000368064	SULF2
ENSG00000080493	391.018	-1.28193	0.291813	-4.39298	1.11807e-05	0.00170248	SLC4A4
ENSG00000198515	82.8956	-1.28651	0.406481	-3.165	0.00155083	0.0828397	CNGA1
ENSG00000164825	61.8394	-1.29191	0.382704	-3.37575	0.000736149	0.0479831	DEFB1
ENSG00000112972	1786.34	-1.29369	0.13375	-9.67243	3.94906e-22	2.89837e-18	HMGCS1
ENSG00000101670	623.229	-1.30003	0.259149	-5.01655	5.26078e-07	0.000134066	LIPG
ENSG00000213626	943.267	-1.30447	0.242665	-5.37559	7.63327e-08	2.9179e-05	LBH
ENSG00000237330	69.9438	-1.31396	0.393387	-3.34011	0.00083746	0.0524441	RNF223
ENSG00000158055	210.047	-1.3164	0.318034	-4.13918	3.4855e-05	0.00420747	GRHL3
ENSG00000008513	518.037	-1.31908	0.213756	-6.17097	6.78713e-10	5.2993e-07	ST3GAL1
ENSG00000169174	393.632	-1.32362	0.266318	-4.97006	6.69307e-07	0.000167085	PCSK9
ENSG00000189431	122.236	-1.32632	0.429858	-3.08548	0.00203223	0.0998348	RASSF10
ENSG00000150556	103.78	-1.32865	0.287343	-4.62394	3.76521e-06	0.000697839	LYPD6B
ENSG00000135960	319.37	-1.3292	0.361345	-3.67849	0.000234616	0.0193477	EDAR
ENSG00000106003	327.467	-1.33654	0.301682	-4.43028	9.41087e-06	0.00147744	LFNG
ENSG00000165507	59.8346	-1.3415	0.413423	-3.24487	0.00117506	0.0675494	DEPP1
ENSG00000116574	624.417	-1.35641	0.236374	-5.7384	9.5577e-09	4.74475e-06	RHOU
ENSG00000148344	1889.59	-1.36492	0.222008	-6.14805	7.84394e-10	5.99686e-07	PTGES
ENSG00000116711	349.068	-1.37039	0.20981	-6.53156	6.50884e-11	5.68703e-08	PLA2G4A
ENSG00000127831	880.482	-1.37284	0.342047	-4.01361	5.97964e-05	0.00636043	VIL1
ENSG00000008323	191.426	-1.37564	0.260626	-5.27823	1.30438e-07	4.27381e-05	PLEKHG6
ENSG00000237289	87.5324	-1.38228	0.35758	-3.86564	0.000110798	0.0103989	CKMT1B
ENSG00000120708	6290.75	-1.38337	0.261691	-5.28627	1.24836e-07	4.19528e-05	TGFBI
ENSG00000183778	1323.37	-1.38729	0.232295	-5.97209	2.34236e-09	1.48203e-06	B3GALT5
ENSG00000102359	247.411	-1.39033	0.263021	-5.28601	1.25016e-07	4.19528e-05	SRPX2
ENSG00000164761	213.46	-1.39185	0.347273	-4.00795	6.12483e-05	0.00648423	TNFRSF11B
ENSG00000121039	929.265	-1.40014	0.144192	-9.71022	2.72755e-22	2.50233e-18	RDH10
ENSG00000134363	110.044	-1.40025	0.341868	-4.09587	4.20594e-05	0.00491545	FST
ENSG00000152766	1140.84	-1.40365	0.290867	-4.82573	1.39493e-06	0.0003047	ANKRD22
ENSG00000079385	1600.55	-1.4177	0.315459	-4.49408	6.98722e-06	0.0011396	CEACAM1
ENSG00000179023	82.5759	-1.42074	0.332087	-4.27822	1.88395e-05	0.00257008	KLHDC7A
ENSG00000134533	86.2478	-1.42084	0.447394	-3.17581	0.00149419	0.0805929	RERG
ENSG00000160181	4640.63	-1.42231	0.310835	-4.57577	4.74463e-06	0.000845212	TFF2
ENSG00000172478	149.59	-1.4264	0.28526	-5.00034	5.72292e-07	0.000144837	MAB21L4
ENSG00000223829	72.9607	-1.42654	0.443191	-3.21879	0.00128731	0.072123	AC004870.2
ENSG00000095585	189.898	-1.44462	0.357439	-4.04159	5.30903e-05	0.00586823	BLNK
ENSG00000089356	55.5092	-1.44601	0.38633	-3.74293	0.00018189	0.0157904	FXYD3
ENSG00000131771	938.164	-1.4467	0.334776	-4.3214	1.55044e-05	0.0022053	PPP1R1B
ENSG00000179750	671.04	-1.45171	0.203286	-7.1412	9.25171e-13	1.24021e-09	APOBEC3B
ENSG00000175538	198.459	-1.45218	0.299916	-4.84198	1.28555e-06	0.000284191	KCNE3
ENSG00000121380	89.7906	-1.45473	0.311449	-4.67086	2.99945e-06	0.000585482	BCL2L14
ENSG00000102048	93.8626	-1.45509	0.44796	-3.24826	0.00116114	0.0669976	ASB9
ENSG00000272622	122.052	-1.45609	0.339112	-4.29384	1.75612e-05	0.00243186	AC010735.2
ENSG00000130433	142.051	-1.45694	0.437215	-3.33231	0.000861284	0.0533894	CACNG6
ENSG00000249992	100.885	-1.47254	0.364923	-4.03522	5.45508e-05	0.00599356	TMEM158
ENSG00000073756	1046.33	-1.48564	0.473297	-3.13892	0.00169572	0.0876073	PTGS2
ENSG00000162407	390.337	-1.48584	0.184093	-8.07113	6.9649e-16	1.82565e-12	PLPP3
ENSG00000078114	170.669	-1.49406	0.349045	-4.28041	1.86548e-05	0.00255439	NEBL
ENSG00000184012	232.039	-1.49686	0.275908	-5.42523	5.7881e-08	2.33833e-05	TMPRSS2
ENSG00000006747	106.614	-1.49789	0.325242	-4.60544	4.11589e-06	0.000747726	SCIN
ENSG00000177694	170.795	-1.50105	0.253469	-5.92202	3.18013e-09	1.88228e-06	NAALADL2
ENSG00000103489	165.701	-1.50405	0.393494	-3.82228	0.000132223	0.0121609	XYLT1
ENSG00000109819	101.571	-1.50767	0.454361	-3.31823	0.0009059	0.0555916	PPARGC1A
ENSG00000268621	293.075	-1.50772	0.367766	-4.09967	4.13746e-05	0.00485087	IGFL2-AS1
ENSG00000128268	88.6421	-1.50861	0.458001	-3.29389	0.000988101	0.0596387	MGAT3
ENSG00000257588	81.1487	-1.51154	0.294791	-5.1275	2.9361e-07	8.41766e-05	AC025154.2
ENSG00000130707	3461.35	-1.51223	0.291784	-5.18272	2.18677e-07	6.63204e-05	ASS1
ENSG00000236699	90.4378	-1.51725	0.306776	-4.94577	7.58415e-07	0.000186789	ARHGEF38
ENSG00000106302	33.3061	-1.51935	0.461192	-3.29441	0.000986297	0.0596279	HYAL4
ENSG00000198734	740.806	-1.52012	0.178354	-8.52303	1.55436e-17	5.18548e-14	F5
ENSG00000111885	199.469	-1.52076	0.295477	-5.14681	2.64947e-07	7.71648e-05	MAN1A1
ENSG00000075461	260.718	-1.52101	0.295793	-5.14213	2.71643e-07	7.84921e-05	CACNG4
ENSG00000103460	317.034	-1.52136	0.336389	-4.52264	6.10744e-06	0.00103392	TOX3
ENSG00000114854	246.92	-1.52709	0.290461	-5.25747	1.46051e-07	4.62037e-05	TNNC1
ENSG00000107742	49.6681	-1.53545	0.448288	-3.42514	0.000614487	0.0417589	SPOCK2
ENSG00000070526	441.79	-1.54467	0.314511	-4.91133	9.04623e-07	0.000212801	ST6GALNAC1
ENSG00000241635	413.594	-1.54718	0.29995	-5.15813	2.49422e-07	7.38148e-05	UGT1A1
ENSG00000259120	35.8278	-1.5554	0.466594	-3.33352	0.000857557	0.0532483	SMIM6
ENSG00000138131	918.967	-1.55941	0.339316	-4.59574	4.3122e-06	0.000775709	LOXL4
ENSG00000197405	95.4021	-1.56308	0.42549	-3.67361	0.000239148	0.0196331	C5AR1
ENSG00000162482	71.0368	-1.57004	0.414658	-3.78636	0.000152872	0.0136495	AKR7A3
ENSG00000080031	253.58	-1.57207	0.315681	-4.97994	6.36027e-07	0.000159865	PTPRH
ENSG00000164120	516.116	-1.58178	0.265871	-5.9494	2.6912e-09	1.64598e-06	HPGD
ENSG00000138152	340.863	-1.59315	0.332232	-4.79529	1.6244e-06	0.000344569	BTBD16
ENSG00000168453	313.614	-1.59634	0.326314	-4.89205	9.97904e-07	0.000230315	HR
ENSG00000012779	612.933	-1.62125	0.524209	-3.09275	0.00198309	0.098609	ALOX5
ENSG00000133710	96.3374	-1.632	0.355258	-4.59385	4.3514e-06	0.000778944	SPINK5
ENSG00000145703	1036.3	-1.63672	0.230283	-7.10743	1.18227e-12	1.49606e-09	IQGAP2
ENSG00000171346	98.2926	-1.63876	0.392275	-4.17758	2.94622e-05	0.00365262	KRT15
ENSG00000133962	19.9924	-1.64195	0.518281	-3.16808	0.0015345	0.0822069	CATSPERB
ENSG00000106541	11249.5	-1.64301	0.263717	-6.23021	4.65814e-10	3.79866e-07	AGR2
ENSG00000184156	65.7648	-1.64469	0.498919	-3.2965	0.000978966	0.0593804	KCNQ3
ENSG00000137501	663.623	-1.64543	0.183802	-8.95216	3.48596e-19	1.59905e-15	SYTL2
ENSG00000152137	80.5841	-1.65267	0.453826	-3.64165	0.000270898	0.0216583	HSPB8
ENSG00000153721	55.298	-1.65327	0.383286	-4.31342	1.60748e-05	0.00225509	CNKSR3
ENSG00000271447	225.499	-1.66407	0.2581	-6.44739	1.13795e-10	9.57953e-08	MMP28
ENSG00000186204	102.653	-1.66803	0.390257	-4.27419	1.91836e-05	0.00260275	CYP4F12
ENSG00000215182	141.428	-1.67246	0.29146	-5.73822	9.56786e-09	4.74475e-06	MUC5AC
ENSG00000167653	730.132	-1.67817	0.49456	-3.39325	0.000690676	0.0460751	PSCA
ENSG00000160182	2028.6	-1.67997	0.280948	-5.97967	2.23589e-09	1.43948e-06	TFF1
ENSG00000142484	251.987	-1.68912	0.389412	-4.33761	1.44041e-05	0.00207289	TM4SF5
ENSG00000167183	509.702	-1.69777	0.225093	-7.54252	4.60967e-14	7.35483e-11	PRR15L
ENSG00000184828	50.1883	-1.7034	0.461027	-3.69479	0.000220064	0.0184799	ZBTB7C
ENSG00000205847	55.2163	-1.70346	0.54087	-3.14949	0.00163558	0.0850317	OR7E91P
ENSG00000142619	50.3643	-1.71977	0.458272	-3.75272	0.000174923	0.0152837	PADI3
ENSG00000069764	42.1354	-1.73364	0.487774	-3.55418	0.000379153	0.0286882	PLA2G10
ENSG00000168398	82.2868	-1.73396	0.443856	-3.90657	9.36166e-05	0.00921031	BDKRB2
ENSG00000118322	127.934	-1.73439	0.387707	-4.47345	7.69683e-06	0.00124428	ATP10B
ENSG00000136059	208.563	-1.73555	0.221258	-7.84403	4.36322e-15	9.41866e-12	VILL
ENSG00000160145	274.63	-1.75177	0.231209	-7.57656	3.5483e-14	5.91873e-11	KALRN
ENSG00000101049	234.517	-1.75544	0.332744	-5.27565	1.32286e-07	4.27529e-05	SGK2
ENSG00000132911	358.96	-1.76031	0.412823	-4.26408	2.00727e-05	0.00265924	NMUR2
ENSG00000007062	164.098	-1.76475	0.439321	-4.017	5.89435e-05	0.00630626	PROM1
ENSG00000111859	1557.29	-1.76612	0.205421	-8.59758	8.14181e-18	2.9878e-14	NEDD9
ENSG00000173702	4007.82	-1.76984	0.299889	-5.90166	3.59852e-09	2.06336e-06	MUC13
ENSG00000181143	307.975	-1.76989	0.55735	-3.17554	0.00149559	0.0805929	MUC16
ENSG00000074966	109.692	-1.77528	0.442128	-4.0153	5.937e-05	0.00633343	TXK
ENSG00000139055	109.094	-1.79252	0.444408	-4.0335	5.49533e-05	0.00601451	ERP27
ENSG00000188761	439.233	-1.80853	0.249167	-7.2583	3.91991e-13	5.99371e-10	BCL2L15
ENSG00000131620	2188.27	-1.81436	0.217934	-8.3253	8.41157e-17	2.57233e-13	ANO1
ENSG00000176153	10631.3	-1.82254	0.298453	-6.10662	1.01763e-09	7.32234e-07	GPX2
ENSG00000156427	44.7901	-1.83438	0.436351	-4.2039	2.62353e-05	0.00333134	FGF18
ENSG00000123095	311.785	-1.84525	0.270343	-6.82557	8.75794e-12	9.18258e-09	BHLHE41
ENSG00000168079	117.664	-1.85055	0.462806	-3.99854	6.37349e-05	0.00666348	SCARA5
ENSG00000066468	256.4	-1.85084	0.241667	-7.65865	1.879e-14	3.28351e-11	FGFR2
ENSG00000144452	451.167	-1.85716	0.314828	-5.89897	3.6577e-09	2.06502e-06	ABCA12
ENSG00000187908	387.483	-1.85874	0.367075	-5.06366	4.11284e-07	0.000110167	DMBT1
ENSG00000229544	120.715	-1.87539	0.329941	-5.68401	1.31573e-08	6.19017e-06	NKX1-2
ENSG00000188039	22.254	-1.88709	0.579023	-3.25909	0.00111769	0.0657307	NWD1
ENSG00000272398	1100.16	-1.89182	0.264837	-7.14331	9.1107e-13	1.24021e-09	CD24
ENSG00000169894	657.427	-1.89565	0.284534	-6.66229	2.69591e-11	2.60347e-08	MUC3A
ENSG00000203697	319.836	-1.90196	0.262858	-7.23569	4.6316e-13	6.79864e-10	CAPN8
ENSG00000118849	882.838	-1.90712	0.175763	-10.8506	1.98215e-27	3.63694e-23	RARRES1
ENSG00000134827	96.1593	-1.91357	0.33822	-5.65776	1.53364e-08	6.94814e-06	TCN1
ENSG00000186007	49.4821	-1.92296	0.547887	-3.50977	0.0004485	0.0325269	LEMD1
ENSG00000197635	412.145	-1.9242	0.377376	-5.0989	3.41637e-07	9.5456e-05	DPP4
ENSG00000139209	156.737	-1.94615	0.392791	-4.95466	7.24574e-07	0.00017966	SLC38A4
ENSG00000134240	168.905	-1.96856	0.550866	-3.57357	0.000352151	0.027092	HMGCS2
ENSG00000086548	20270.6	-2.01766	0.499941	-4.0358	5.44171e-05	0.00599356	CEACAM6
ENSG00000158125	166.326	-2.01812	0.393701	-5.12603	2.95923e-07	8.4182e-05	XDH
ENSG00000180861	161.118	-2.02336	0.338194	-5.98286	2.19258e-09	1.43681e-06	LINC01559
ENSG00000203985	29.4728	-2.03711	0.601154	-3.38866	0.000702358	0.0466084	LDLRAD1
ENSG00000163121	44.9036	-2.0397	0.517168	-3.94397	8.0143e-05	0.00805755	NEURL3
ENSG00000137648	1754.94	-2.04063	0.206424	-9.88561	4.80639e-23	5.87934e-19	TMPRSS4
ENSG00000103888	553.163	-2.04213	0.609336	-3.35141	0.000804007	0.0508701	CEMIP
ENSG00000285933	26.8218	-2.04276	0.659992	-3.09514	0.00196723	0.0982196	AP003498.2
ENSG00000102760	128.915	-2.05762	0.265909	-7.73808	1.00927e-14	1.85187e-11	RGCC
ENSG00000095739	200.57	-2.07593	0.2927	-7.09233	1.31875e-12	1.61314e-09	BAMBI
ENSG00000187288	52.5198	-2.08981	0.616495	-3.38982	0.000699393	0.0464957	CIDEC
ENSG00000157613	363.401	-2.10001	0.367064	-5.7211	1.05838e-08	5.17857e-06	CREB3L1
ENSG00000121966	17.6436	-2.10081	0.660276	-3.18171	0.00146406	0.0794774	CXCR4
ENSG00000136689	618.12	-2.1346	0.376926	-5.66318	1.48594e-08	6.90247e-06	IL1RN
ENSG00000005187	201.254	-2.15499	0.266614	-8.08283	6.32817e-16	1.78634e-12	ACSM3
ENSG00000187957	117.333	-2.17149	0.49149	-4.41818	9.95372e-06	0.00154776	DNER
ENSG00000082397	154.594	-2.17974	0.403037	-5.40828	6.36316e-08	2.51373e-05	EPB41L3
ENSG00000170927	42.2493	-2.19662	0.451536	-4.86477	1.14589e-06	0.000256407	PKHD1
ENSG00000164266	124.798	-2.19949	0.38297	-5.74324	9.28822e-09	4.73402e-06	SPINK1
ENSG00000082074	25.1991	-2.22293	0.623526	-3.5651	0.00036372	0.0278072	FYB1
ENSG00000113303	225.534	-2.22584	0.390472	-5.70037	1.1955e-08	5.77255e-06	BTNL8
ENSG00000163286	263.088	-2.26939	0.34104	-6.65432	2.84618e-11	2.67811e-08	ALPG
ENSG00000125848	336.276	-2.27213	0.292019	-7.78077	7.2083e-15	1.39223e-11	FLRT3
ENSG00000186529	492.334	-2.284	0.677143	-3.37299	0.000743558	0.0481772	CYP4F3
ENSG00000234460	14.5759	-2.31204	0.642601	-3.59794	0.000320752	0.0250973	AL772337.3
ENSG00000185467	34.8499	-2.33232	0.555494	-4.19864	2.68521e-05	0.00338622	KPNA7
ENSG00000163283	728.657	-2.36349	0.334251	-7.07101	1.53813e-12	1.7639e-09	ALPP
ENSG00000175311	58.3963	-2.36522	0.513864	-4.60282	4.16816e-06	0.000753493	ANKS4B
ENSG00000136869	312.735	-2.37236	0.335938	-7.06192	1.64222e-12	1.82619e-09	TLR4
ENSG00000107731	266.356	-2.37705	0.35431	-6.70897	1.95999e-11	1.94394e-08	UNC5B
ENSG00000167614	36.1233	-2.38032	0.595659	-3.9961	6.43933e-05	0.00671318	TTYH1
ENSG00000165272	1076.08	-2.38415	0.17771	-13.416	4.87479e-41	1.7889e-36	AQP3
ENSG00000060566	355.984	-2.39294	0.438844	-5.45281	4.95798e-08	2.06753e-05	CREB3L3
ENSG00000109205	19.1243	-2.39563	0.689857	-3.47265	0.000515346	0.0361599	ODAM
ENSG00000182836	52.7578	-2.40231	0.633964	-3.78935	0.00015104	0.0135519	PLCXD3
ENSG00000198535	51.4905	-2.41882	0.603647	-4.00702	6.14904e-05	0.00648423	C2CD4A
ENSG00000187094	30.1784	-2.42727	0.725012	-3.34791	0.000814239	0.0512523	CCK
ENSG00000134258	35.7169	-2.43022	0.532623	-4.56275	5.04888e-06	0.000886501	VTCN1
ENSG00000006606	113.396	-2.5255	0.538595	-4.68905	2.74473e-06	0.000538627	CCL26
ENSG00000197408	185.885	-2.55116	0.487541	-5.23271	1.67043e-07	5.2393e-05	CYP2B6
ENSG00000111701	12.8862	-2.58456	0.826486	-3.12716	0.00176501	0.0904618	APOBEC1
ENSG00000086696	196.767	-2.60161	0.273537	-9.51102	1.88795e-21	1.1547e-17	HSD17B2
ENSG00000184845	15.5931	-2.60885	0.796752	-3.27436	0.00105901	0.0628845	DRD1
ENSG00000163207	22.4964	-2.63937	0.731387	-3.60871	0.000307721	0.0242327	IVL
ENSG00000124664	44.4759	-2.68625	0.689252	-3.89735	9.72515e-05	0.00944137	SPDEF
ENSG00000148735	138.848	-2.73592	0.455391	-6.00784	1.88009e-09	1.27766e-06	PLEKHS1
ENSG00000064787	204.528	-2.75402	0.389434	-7.07184	1.52894e-12	1.7639e-09	BCAS1
ENSG00000137033	41.515	-2.77038	0.852099	-3.25125	0.001149	0.0665059	IL33
ENSG00000232803	13.2077	-2.78129	0.822729	-3.38056	0.000723376	0.0472344	SLCO4A1-AS1
ENSG00000214814	74.8312	-2.79147	0.71946	-3.87995	0.000104477	0.00993261	FER1L6
ENSG00000105141	67.369	-2.86949	0.564675	-5.08167	3.74124e-07	0.000103227	CASP14
ENSG00000174502	50.3947	-2.93095	0.486239	-6.0278	1.66211e-09	1.15084e-06	SLC26A9
ENSG00000112902	87.0547	-2.95271	0.481806	-6.12842	8.87562e-10	6.62075e-07	SEMA5A
ENSG00000248144	34.5658	-2.96987	0.742228	-4.00129	6.29993e-05	0.00660539	ADH1C
ENSG00000105388	1648.47	-3.02819	0.334933	-9.04119	1.54982e-19	8.12482e-16	CEACAM5
ENSG00000288073	10.5987	-3.06379	0.970117	-3.15817	0.00158765	0.0843157	AC022463.1
ENSG00000007306	54.8641	-3.21977	0.615964	-5.2272	1.72095e-07	5.352e-05	CEACAM7
ENSG00000100557	18.538	-3.27214	0.750166	-4.36189	1.28942e-05	0.0018777	CCDC198
ENSG00000243955	56.7117	-3.28247	0.616492	-5.32443	1.01269e-07	3.57332e-05	GSTA1
ENSG00000178597	23.0436	-3.32606	0.841388	-3.95306	7.7157e-05	0.00782164	PSAPL1
ENSG00000102837	21.4925	-3.40435	0.754696	-4.51089	6.45568e-06	0.00106905	OLFM4
ENSG00000229155	18.202	-3.43925	0.806797	-4.26284	2.01842e-05	0.00266438	LINC02038
ENSG00000166959	9.21714	-3.44053	0.974725	-3.52974	0.000415963	0.0304683	MS4A8
ENSG00000170477	38.8975	-3.85535	0.629359	-6.12584	9.02084e-10	6.62075e-07	KRT4
ENSG00000162383	7.35485	-4.04346	1.08931	-3.71194	0.000205676	0.0175527	SLC1A7
ENSG00000172955	6.56537	-4.09755	1.2474	-3.28487	0.00102028	0.0613193	ADH6
ENSG00000224259	10.2533	-5.10644	1.09912	-4.64596	3.385e-06	0.000637023	LINC01133
ENSG00000270624	0.522405	-16.1354	3.7781	-4.27079	1.94786e-05	0.00261833	AC008555.3
ENSG00000259717	0.458793	-16.4445	3.79329	-4.33514	1.45666e-05	0.00208808	LINC00677
ENSG00000235635	0.412429	-16.5662	3.79328	-4.36724	1.25826e-05	0.00185057	AC016644.1
ENSG00000223390	0.405114	-19.2428	3.77462	-5.09795	3.43357e-07	9.5456e-05	AL445685.1
ENSG00000116194	0.56518	-20.0997	3.76555	-5.33778	9.40922e-08	3.43769e-05	ANGPTL1
ENSG00000221866	0.485373	-20.2239	3.77156	-5.36219	8.22178e-08	3.11046e-05	PLXNA4
ENSG00000232164	0.925936	-20.9974	3.45837	-6.07147	1.26746e-09	8.94464e-07	LINC01873
